# Supplementary material
Source: PubMed Central journal article supplement (PMC5934799)
Supplement: blood810622-suppl1.pdf [file blood810622-suppl1.pdf]

## SUPPLEMENTAL MATERIAL

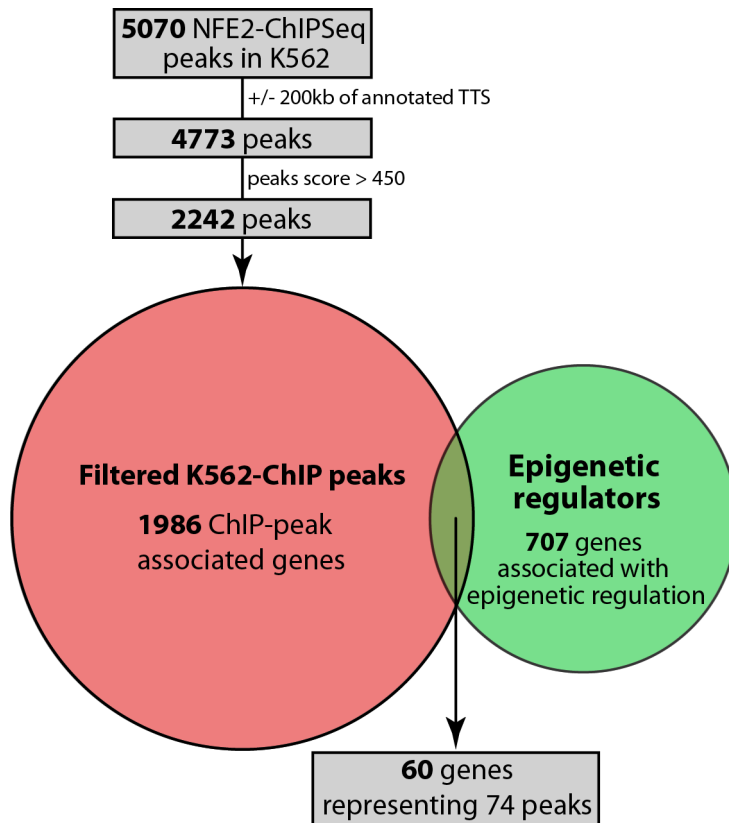

### Supplemental Figure 1: Strategy for Identifying Epigenetic Regulators as Novel Target Genes.

ChIPseq analysis of NFE2 chromatin binding in K562 cells, provided by the ENCODE Consortium, was used to identify 5070 sites bound by this transcription factor <sup>1</sup>. Of these 4773 were within 200 kb of a transcriptional start site <sup>2</sup> and a subset of 2242 were considered highly significant (peak score above 450). These peaks were associated with 1986 genes, which were subsequently compared to a list of 707 epigenetic modifiers, published by Plaas and colleagues <sup>3,4</sup>. 60 epigenetic regulators that constitute potential novel NFE2 target genes were identified and are listed in Supplemental Table 1.

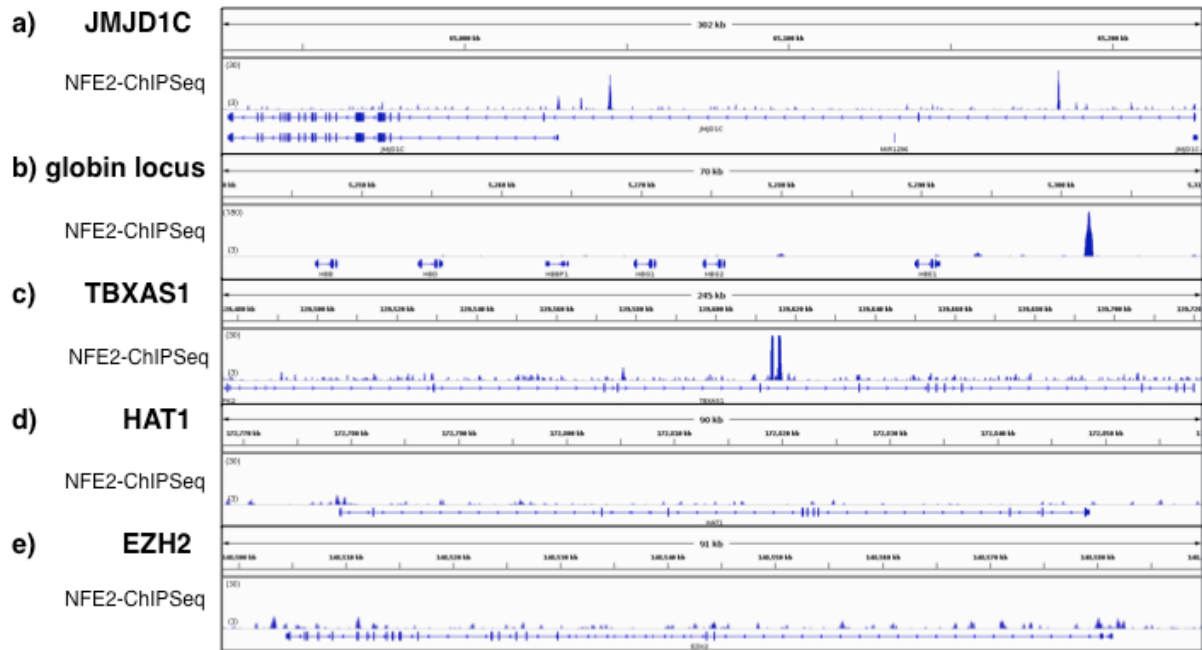

**Supplemental Figure 2: NFE2 chromatin binding analyzed by ChIP-seq at various gene loci.**

Visualization of NFE2 chromatin binding by ChIP-Seq at the following gene loci (ENCODE data) **(a)** JMJD1C, **(b and c)** beta-globin and TBXAS1 (known NF-E2 target genes as positive controls), **(d and e)** HAT1 and EZH2, (epigenetic enzymes, which do not show NF-E2 enrichment as negative controls).

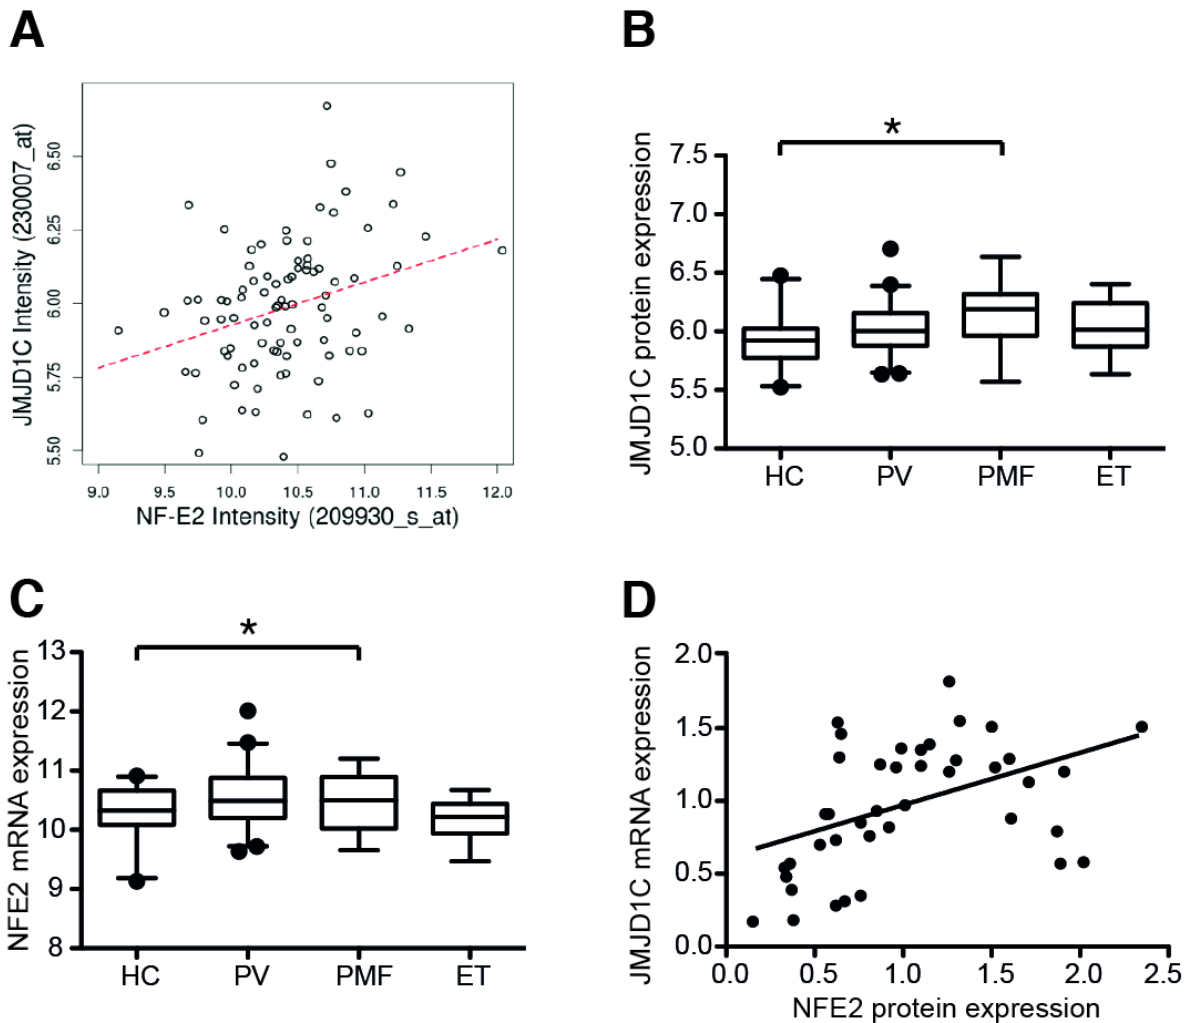

**Supplemental Figure 3. Analysis of protein and mRNA expression levels of NFE2 and JMJD1C.**

(A) Published expression data from DNA microarrays from 69 MPN patients (41 PV / 19 ET / 9 PMF) and 21 healthy controls (HC) was used<sup>5</sup>. Statistical significance was determined using Spearman's correlation coefficient,  $p=0.0035$ . (B) Box plots of mRNA expression levels of JMJD1C (B) and NFE2 (C). Whiskers depict the 95% confidence interval. The nonparametric Kruskal-Wallis test yielded significant results indicating that samples originate from distinct distributions ( $p=0.036$  and  $p=0.05$  for JMJD1C and NF-E2, respectively). Statistical significance between groups was assessed using the Wilcoxon signed-rank test,  $*p<0.05$ . In total, 35 patients (50.7%) for JMJD1C and 30 (43.5%) patients for NFE2 showed mRNA expression levels above the 95% confidence interval of the HC. The comparably low elevation of NFE2 expression levels in this study contradicts results from multiple previous publications<sup>6,7,8</sup>. (D) Correlation of JMJD1C and NFE2 protein levels. Statistical significance was determined using Spearman's correlation coefficient,  $p=0.0005$ . See Supplemental Table 6 for patient characteristics.

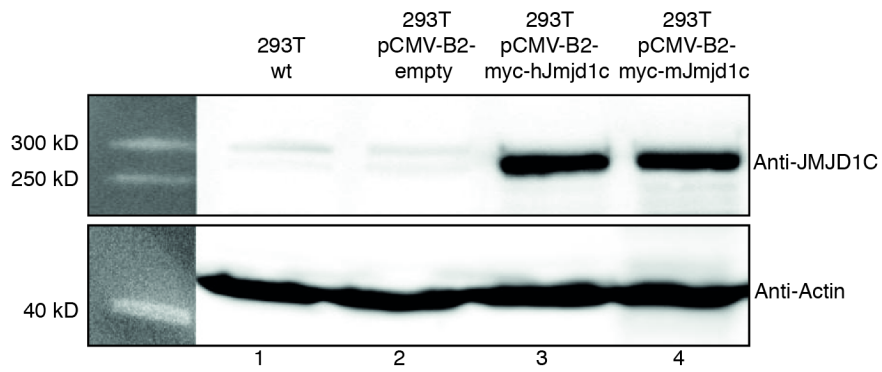

**Supplemental Figure 4. Validation of the JMJD1C Antibody.** 293T cells were left untransduced (lane 1), transduced with an empty vector (lane 2) or with vectors encoding human or murine JMJD1C cDNAs (lanes 3 and 4, respectively). Whole cell extracts were subjected to Western Blotting and interrogated with an anti-JMJD1C antibody (top) and subsequently with an antibody to actin (bottom) to assure equal loading.

**Supplemental Table 1: ChIP Antibodies.**

|                  |                       |
|------------------|-----------------------|
| NFE2             | Santa Cruz, sc-291    |
| control anti-IgG | Cell Signaling, #2729 |
| H3K9me2          | Activ Motif, 39753    |
| HP1 $\alpha$     | Cell Signaling, C7F11 |
| H3Y41ph          | Abcam, 26310          |
| JMJD1C           | Abcam, AB31215        |

**Supplemental Table 2:** Primers used for DNA amplification after Chromatin Immunoprecipitation.

|                                  |                                 |
|----------------------------------|---------------------------------|
| <i>JMJD1C</i> -120 bp FP         | 5' CTTGAGCTTTTCAGTCTCGCC 3'     |
| <i>JMJD1C</i> -120 bp RP         | 5' TCACAGGTGCTGATGGAGTC 3'      |
| <i>JMJD1C</i> -16 kb FP          | 5' TGACATTCAGGTTCTGCTCC 3'      |
| <i>JMJD1C</i> -16 kb RP          | 5' GGGCCTACACCATTGATAAC 3'      |
| <i>JMJD1C</i> -154 kb FP         | 5' CTTCATACATTGATGATGGGAAC 3'   |
| <i>JMJD1C</i> -154 kb RP         | 5' CTCTGTTGCTGGACATTTGG 3'      |
| <i>JMJD1C</i> +3.2 kb control FP | 5' AGATTGCAGTGAGTCAACCTG 3'     |
| <i>JMJD1C</i> +3,2 kb control RP | 5' ATTGTGTTTCCCCTTTCTCTTATTC 3' |
| <i>myogenin</i> control FP       | 5' AGGGGCTGCTGAGAAATGAAAAC 3'   |
| <i>myogenin</i> control RP       | 5' ATATAGCCAACGCCACAGAAACCT 3'  |
| <i>NFE2 1A</i> Promotor FP       | 5' CGTCTGAAGCCCTCGGCCTGAG 3'    |
| <i>NFE2 1A</i> Promotor RP       | 5' AGAAACGCAGACCTGGCTGGACTC 3'  |
| <i>NFE2 1F</i> Promotor FP       | 5' TTCCAAGATGATGACAGTATATGC 3'  |
| <i>NFE2 1F</i> Promotor RP       | 5' CTGATTGTATGGGTAAAGGTATGG 3'  |
| <i>NFE2</i> -5kb Enhancer FP     | 5' CAGAAAATTAGCTGGGCATCTTGGC 3' |
| <i>NFE2</i> -5kb Enhancer RP     | 5' GCTTGGGTCCTGGCATTATTGGC 3'   |

**Supplemental Table 3:** Antibodies used for Immunoblotting.

|                |                                 |
|----------------|---------------------------------|
| NFE2           | Goerttler et al., 2005          |
| JMJD1C         | Abcam, AB31215                  |
| JMJD1C         | Merck Millipore, 17-10262       |
| SHP-1          | Cell Signaling, C14H6           |
| JAK2           | Cell Signaling, 3230            |
| phospho-JAK2   | QCB inc., 44-426                |
| HP1 $\alpha$   | Cell Signaling, C7F11           |
| H3K9me3        | Millipore, 07-442               |
| H3K9me2        | Activ motif, 39753              |
| H3K9me1        | Millipore, 07-450               |
| $\beta$ -ACTIN | Sigma-Aldrich, Clone AC-15      |
| HISTONE 3      | Abcam, AB1791                   |
| GAPDH          | Sigma-Aldrich, Clone 71.1       |
| PU.1           | Cell Signaling Technology, 2266 |

**Supplemental Table 4:** Primers used for quantitative RT-PCR.

|                        |                                 |
|------------------------|---------------------------------|
| B2-microglobulin FP    | 5' CTTTCTGGTGCTTGTCTCACTGAC 3'  |
| B2-microglobulin RP    | 5' GGTGGCGTGAGTATACTTGAATTTG 3' |
| B2-microglobulin Probe | 5' ATCCAGAAAACCCC 3'            |



### Supplemental Table 5: Potential Novel Target Genes

For each peak, the Peak Signal Value reported by ENCODE is given (<https://genome.ucsc.edu/encode>). Peak Signal Values range: 0 – 1000.

Genes are sorted in the following order:

The two genes containing three potential NFE2 peaks, ordered by the sum of the peak values, followed by the ten genes containing two potential NFE2 peaks, ordered by the sum of the peak values, followed by the remaining genes containing one NFE2 peak, ordered by the peak value <sup>2</sup>.

| GeneID   | Peak value<br>1 | Peak value<br>2 | Peak value<br>3 | Sum of peak<br>values |
|----------|-----------------|-----------------|-----------------|-----------------------|
| SMYD3    | 1000            | 1000            | 488             | 2488                  |
| SETMAR   | 719             | 670             | 480             | 1869                  |
| ATXN7L1  | 961             | 501             |                 | 1462                  |
| CHD6     | 1000            | 899             |                 | 1899                  |
| EED      | 808             | 471             |                 | 1279                  |
| NCOR2    | 641             | 458             |                 | 1099                  |
| SMARCD3  | 556             | 529             |                 | 1085                  |
| NR3C1    | 579             | 496             |                 | 1075                  |
| TBL1XR1  | 536             | 506             |                 | 1042                  |
| TRIM27   | 528             | 457             |                 | 985                   |
| JMJD1C   | 495             | 457             |                 | 952                   |
| CENPO    | 456             | 453             |                 | 909                   |
| BRD2     | 1000            |                 |                 | 1000                  |
| KAT5     | 1000            |                 |                 | 1000                  |
| NIPBL    | 1000            |                 |                 | 1000                  |
| HIST1H4H | 885             |                 |                 | 885                   |
| PRDM6    | 875             |                 |                 | 875                   |
| CHD9     | 845             |                 |                 | 845                   |
| USP25    | 842             |                 |                 | 842                   |
| UBE2H    | 790             |                 |                 | 790                   |
| PPP2R2D  | 761             |                 |                 | 761                   |
| ADNP2    | 749             |                 |                 | 749                   |
| TET2     | 747             |                 |                 | 747                   |
| ZMYND8   | 745             |                 |                 | 745                   |
| UBR2     | 707             |                 |                 | 707                   |
| GTF2A1   | 696             |                 |                 | 696                   |
| HLCS     | 641             |                 |                 | 641                   |
| HIST1H1C | 625             |                 |                 | 625                   |
| SALL1    | 566             |                 |                 | 566                   |
| PPP2R2C  | 564             |                 |                 | 564                   |
| EP400    | 553             |                 |                 | 553                   |
| PRDM1    | 550             |                 |                 | 550                   |
| IDH1     | 545             |                 |                 | 545                   |
| TRIM33   | 542             |                 |                 | 542                   |
| KBTBD7   | 536             |                 |                 | 536                   |
| ZZZ3     | 534             |                 |                 | 534                   |
| ZNF518B  | 526             |                 |                 | 526                   |
| EHMT1    | 521             |                 |                 | 521                   |
| SIRT1    | 513             |                 |                 | 513                   |
| MAP3K8   | 507             |                 |                 | 507                   |
| ZFPM2    | 507             |                 |                 | 507                   |

|          |     |  |     |
|----------|-----|--|-----|
| JAZF1    | 505 |  | 505 |
| HIST1H4B | 504 |  | 504 |
| RPS6KA5  | 500 |  | 500 |
| BTA1F1   | 497 |  | 497 |
| DPF1     | 497 |  | 497 |
| FLYWCH1  | 497 |  | 497 |
| GADD45A  | 492 |  | 492 |
| PPP2R5A  | 492 |  | 492 |
| SNAI2    | 485 |  | 485 |
| MYT1L    | 484 |  | 484 |
| BRWD1    | 480 |  | 480 |
| YEATS2   | 480 |  | 480 |
| CREBBP   | 471 |  | 471 |
| PADI4    | 464 |  | 464 |
| SENP7    | 459 |  | 459 |
| SETD8    | 459 |  | 459 |
| BRD7     | 458 |  | 458 |
| PIAS4    | 457 |  | 457 |
| TAF4     | 457 |  | 457 |

**Supplemental Table 6: Patient characteristics**

UPN: unique patient number; HB: hemoglobin, PLT: platelet count, WBC: white blood cell count; Follow up: from time of diagnosis to sample acquisition; cytoreductive treatment at the time of sample acquisition. PV patients were, in addition, treated by phlebotomy and ASS, according to international guidelines.

| UPN   | Diagnosis | Driver mutation       | HB (g/dl) | WBC (G/l)             | PLT (G/l) | Follow up    | cytoreductive treatment  |
|-------|-----------|-----------------------|-----------|-----------------------|-----------|--------------|--------------------------|
| 1457  | PV        | JAK2 <sup>V617F</sup> | 7.9       | 25.9                  | 48        | 21 years     | -                        |
| 1732  |           |                       | 10.8      | 8.1                   | 678       | 15 years     | Hydroxyurea + Anagrelide |
| 3984  |           |                       | 16.4      | 6.4                   | 517       | 12 years     | Hydroxyurea              |
| 5183  |           |                       | 15.6      | 8.1                   | 567       | 16 years     | Hydroxyurea              |
| 5936  |           |                       | 14.0      | 6.2                   | 448       | 17 years     | Hydroxyurea              |
| 6739  |           |                       | 14.9      | 25.6                  | 502       | 12 years     | -                        |
| 10582 |           |                       | 21.9      | 11.58                 | 339       | 1 year       | -                        |
| 10528 |           |                       | 18.2      | 8.97                  | 369       | 4 years      | -                        |
| 10559 |           |                       | 8.6       | 16.44                 | 254       | 19 years     | Ruxolitinib              |
| 10584 |           |                       | 18.5      | 7.68                  | 584       | at diagnosis | -                        |
| 2804  |           |                       | ET        | JAK2 <sup>V617F</sup> | 15.4      | 10           | 985                      |
| 2750  | 17.1      | 10.4                  |           |                       | 1062      | 17 years     | Anagrelide               |
| 10604 | 12        | 11                    |           |                       | 531       | 4.5 years    | Anagrelide               |
| 10709 | CALR      | 12.8                  |           | 5.4                   | 1163      | 7 years      | Hydroxyurea              |
| 2860  | PMF       | JAK2 <sup>V617F</sup> | 16.5      | 13.1                  | 821       | 5.5 years    | Hydroxyurea              |
| 2912  |           |                       | 14.6      | 8.2                   | 598       | 3 years      | -                        |
| 2867  |           | CALR                  | 10.1      | 7.6                   | 575       | 5 years      | Hydroxyurea              |
| 2941  |           |                       | 14.9      | 7.72                  | 869       | at diagnosis | -                        |
| 10561 |           |                       | 11.9      | 5.84                  | 185       | 3 years      | Ruxolitinib              |
| 10696 |           |                       | 13.9      | 12.88                 | 713       | at diagnosis | -                        |

## References:

1. ENCODE Consortium. A user's guide to the encyclopedia of DNA elements (ENCODE). *PLoS Biol.* 2011;9(4):e1001046.
2. Jin F, Li Y, Dixon JR, et al. A high-resolution map of the three-dimensional chromatin interactome in human cells. *Nature.* 2013;503(7475):290-294.
3. Plass C, Pfister SM, Lindroth AM, Bogatyrova O, Claus R, Lichter P. Mutations in regulators of the epigenome and their connections to global chromatin patterns in cancer. *Nat Rev Genet.* 2013;14(11):765-780.
4. Gu L, Frommel SC, Oakes CC, et al. BAZ2A (TIP5) is involved in epigenetic alterations in prostate cancer and its overexpression predicts disease recurrence. *Nat Genet.* 2015;47(1):22-30.
5. Skov V, Thomassen M, Riiley CH et al. Gene expression profiling with principal component analysis depicts the biological continuum from essential thrombocythemia over polycythemia vera to myelofibrosis *Eur J Haematol.* 2012;40(1):771-780
6. Kralovics, R., Teo, S., Buser et al. Altered gene expression in myeloproliferative disorders correlates with activation of signaling by the V617F mutation of Jak2. *Blood.* 2005;106(10), 3374-3376.
7. Goerttler PS, Kreutz C, Donauer J, et al. Gene expression profiling in polycythaemia vera: overexpression of transcription factor NF-E2. *British Journal of Haematology.* 2005;129(1):138-150.
8. Wang W, Schwemmers S, Hexner EO, Pahl HL. AML1 is overexpressed in patients with myeloproliferative neoplasms and mediates JAK2V617F-independent overexpression of NF-E2. *Blood.* 2010;116:254-266.
